# Supplementary material for: Identification and Total Synthesis of Two Previously Unreported Odd-Chain Bis-Methylene-Interrupted Fatty Acids with a Terminal Olefin that Activate Protein Phosphatase, Mg2+/Mn2+-Dependent 1A (PPM1A) in Ovaries of the Limpet Cellana toreuma
Source: MDPI journal article supplement (doi:10.3390/md17070410), 2019-07-11
Supplement: s1 [file s1]

## Supporting Information

### Identification and Total Synthesis of Two Previously Unreported Odd-Chain Bis-Methylene-Interrupted Fatty Acids with a Terminal Olefin that Activate Protein Phosphatase, Mg<sup>2+</sup>/Mn<sup>2+</sup>-Dependent 1A (PPM1A) in Ovaries of the Limpet *Cellana toreuma*

Hideki Kawashima, Naoki Toyooka, Takuya Okada, Huy Du Nguyen, Yuya Nishikawa, Yuka Miura, Nana Inoue, Motoko Ohnishi, and Ken-ichi Kimura

#### The Table of Contents

|                                                                                                 |    |
|-------------------------------------------------------------------------------------------------|----|
| Figure S1 <sup>1</sup> H and <sup>13</sup> C NMR spectra of <b>4b</b> .....                     | S1 |
| Figure S2 <sup>1</sup> H and <sup>13</sup> C NMR spectra of <b>6a</b> .....                     | S2 |
| Figure S3 <sup>1</sup> H and <sup>13</sup> C NMR spectra of <b>6b</b> .....                     | S3 |
| Figure S4 <sup>1</sup> H and <sup>13</sup> C NMR spectra of synthesized compound <b>1</b> ..... | S4 |
| Figure S5 <sup>1</sup> H and <sup>13</sup> C NMR spectra of synthesized compound <b>2</b> ..... | S5 |

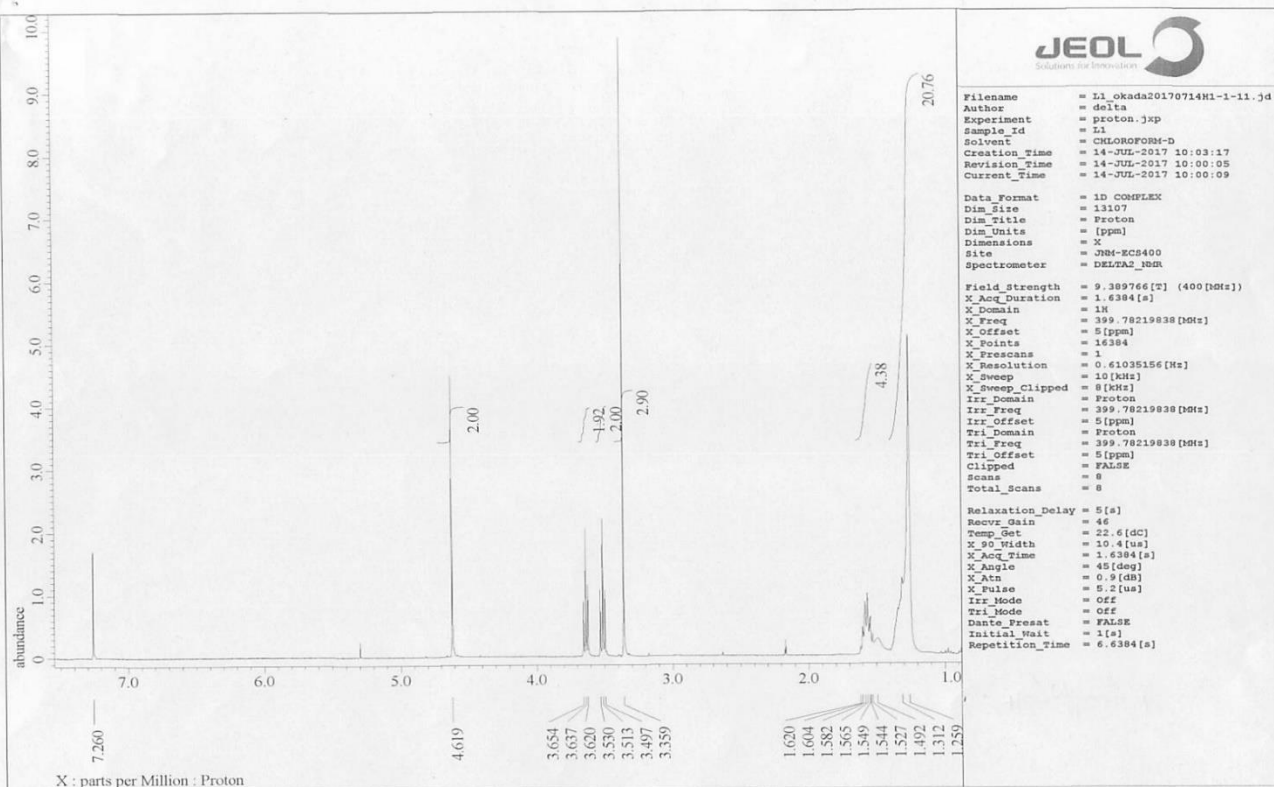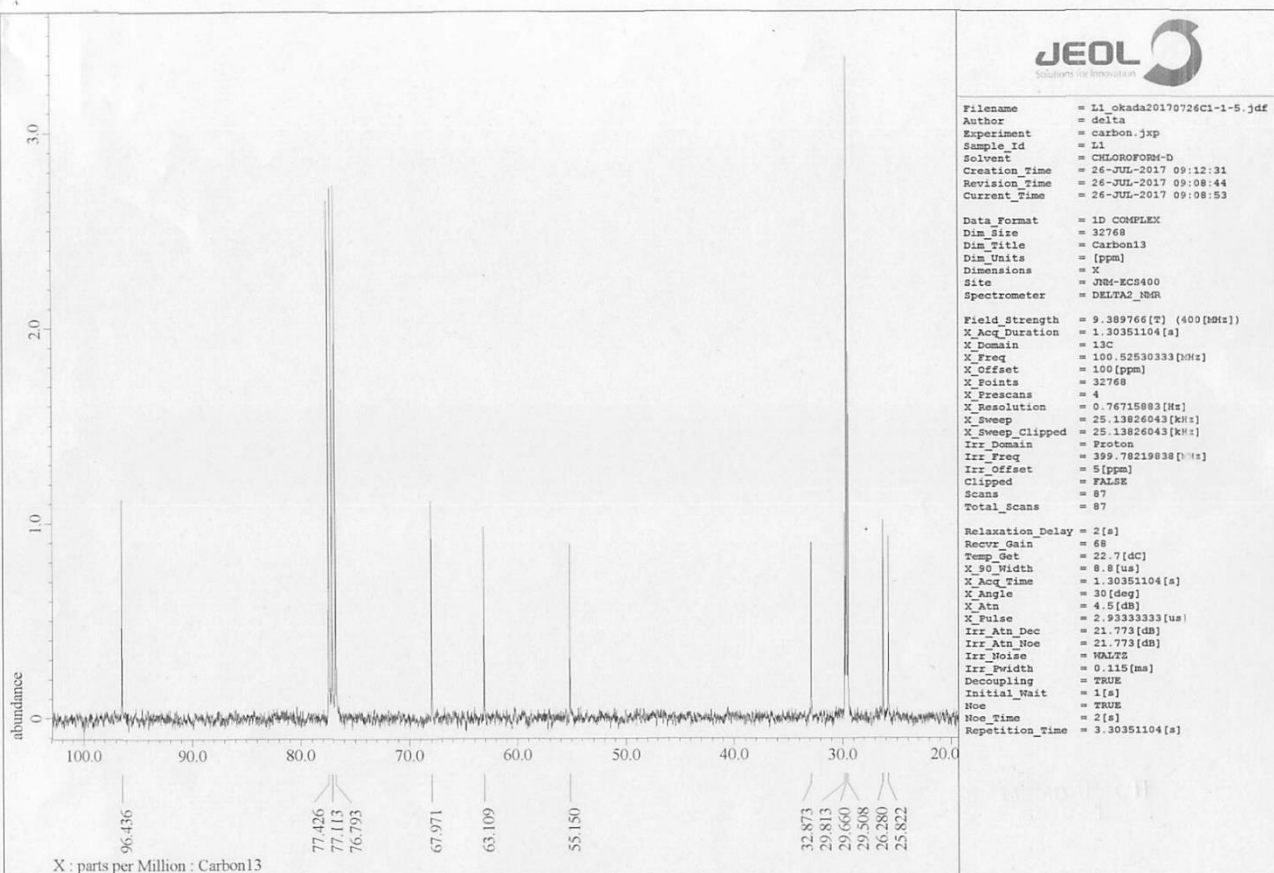

Figure S1 <sup>1</sup>H and <sup>13</sup>CMR spectra of **4b**

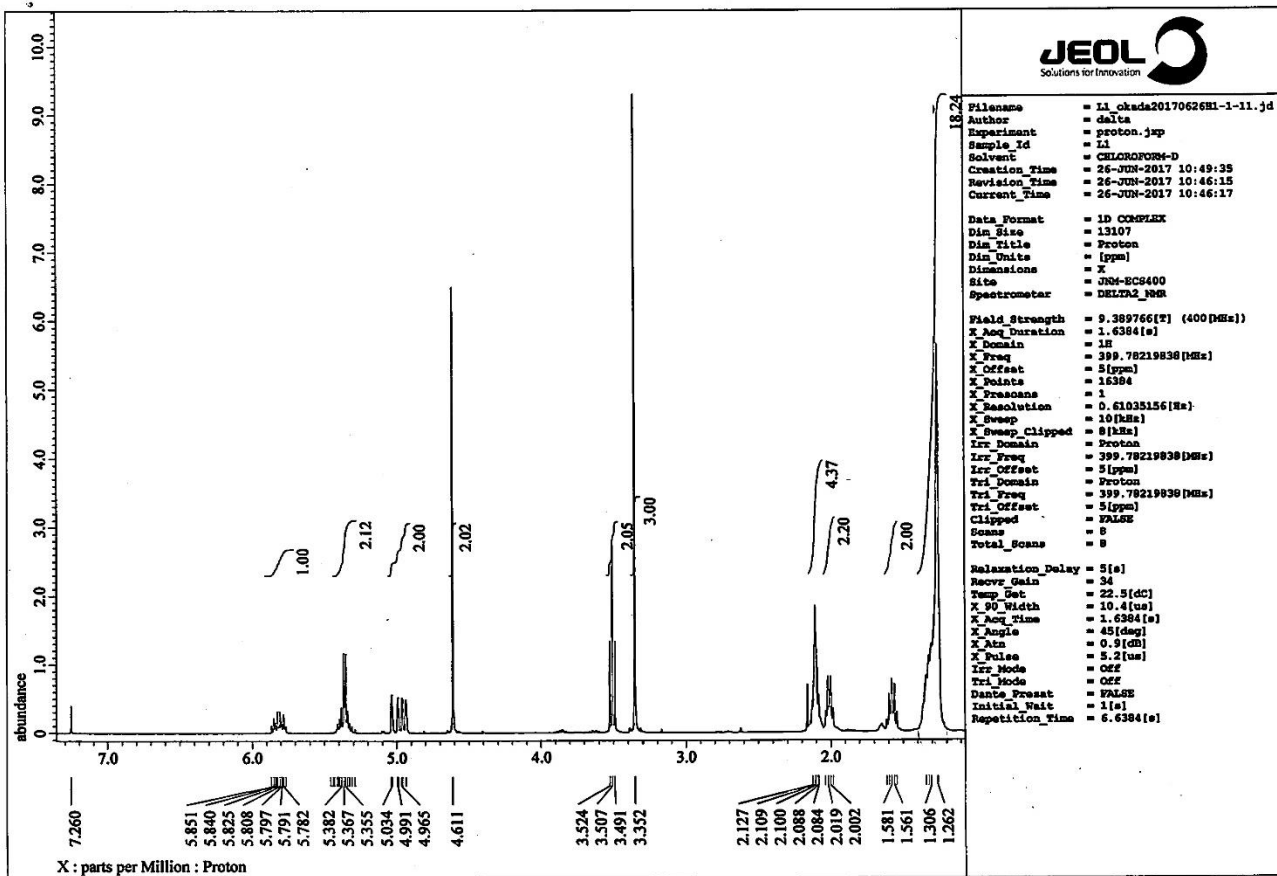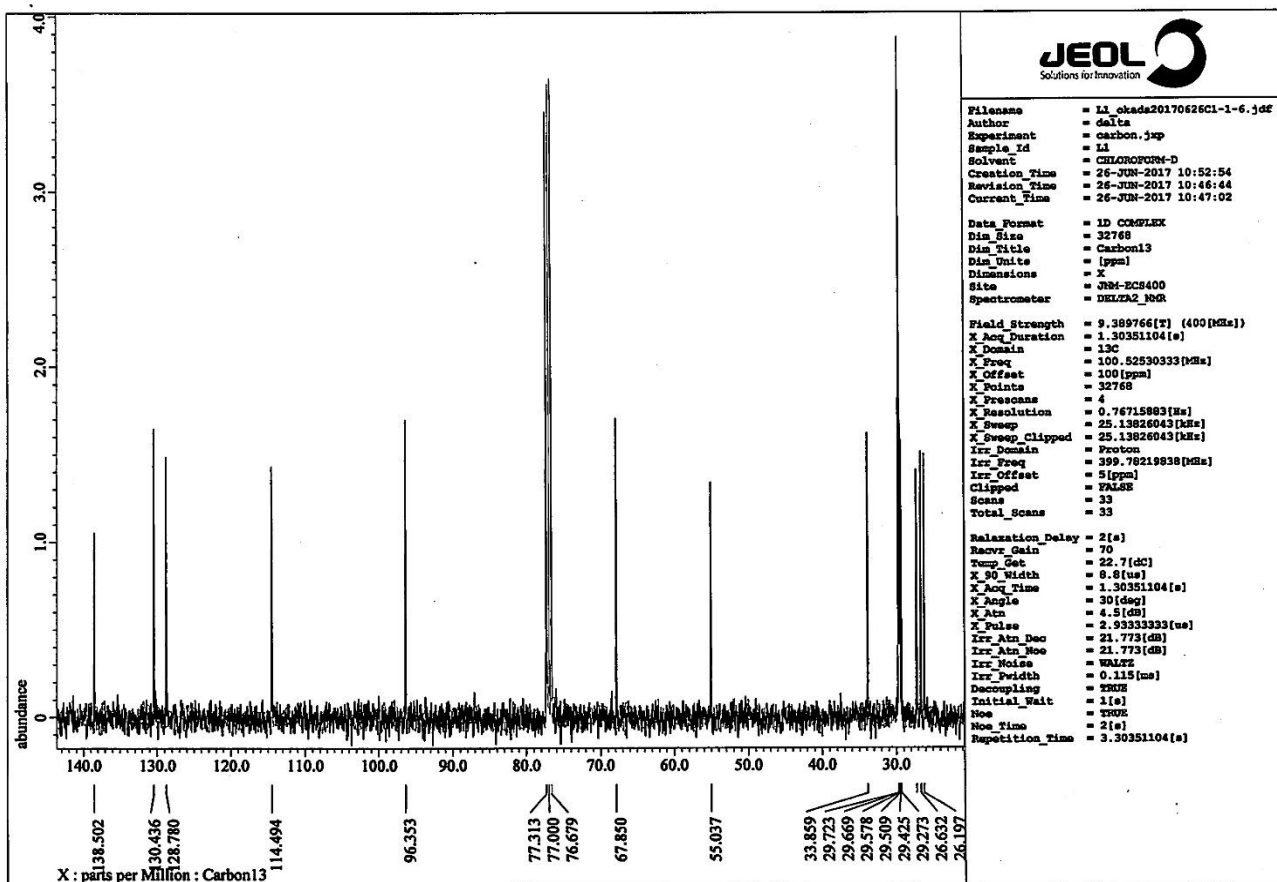

Figure S2 <sup>1</sup>H and <sup>13</sup>CMR spectra of 6a

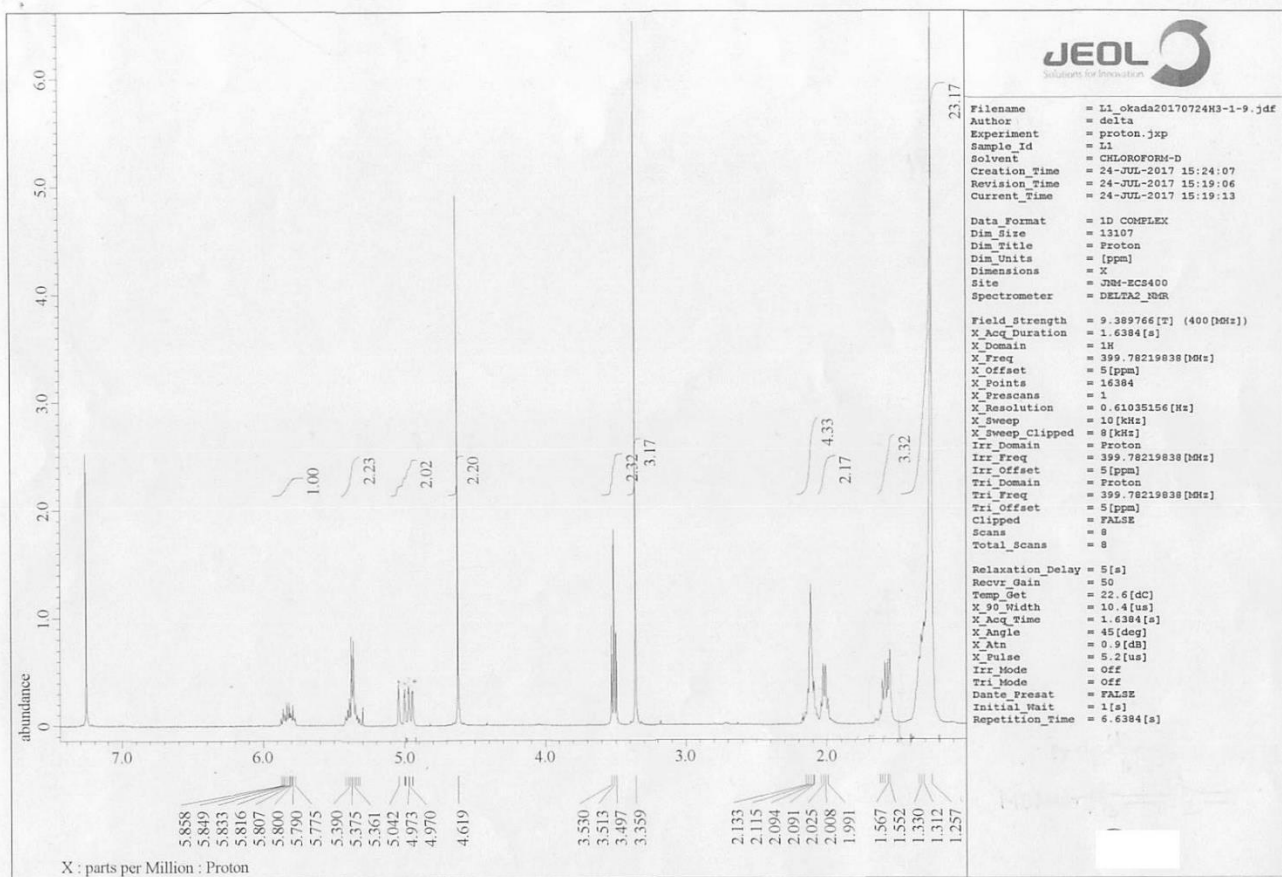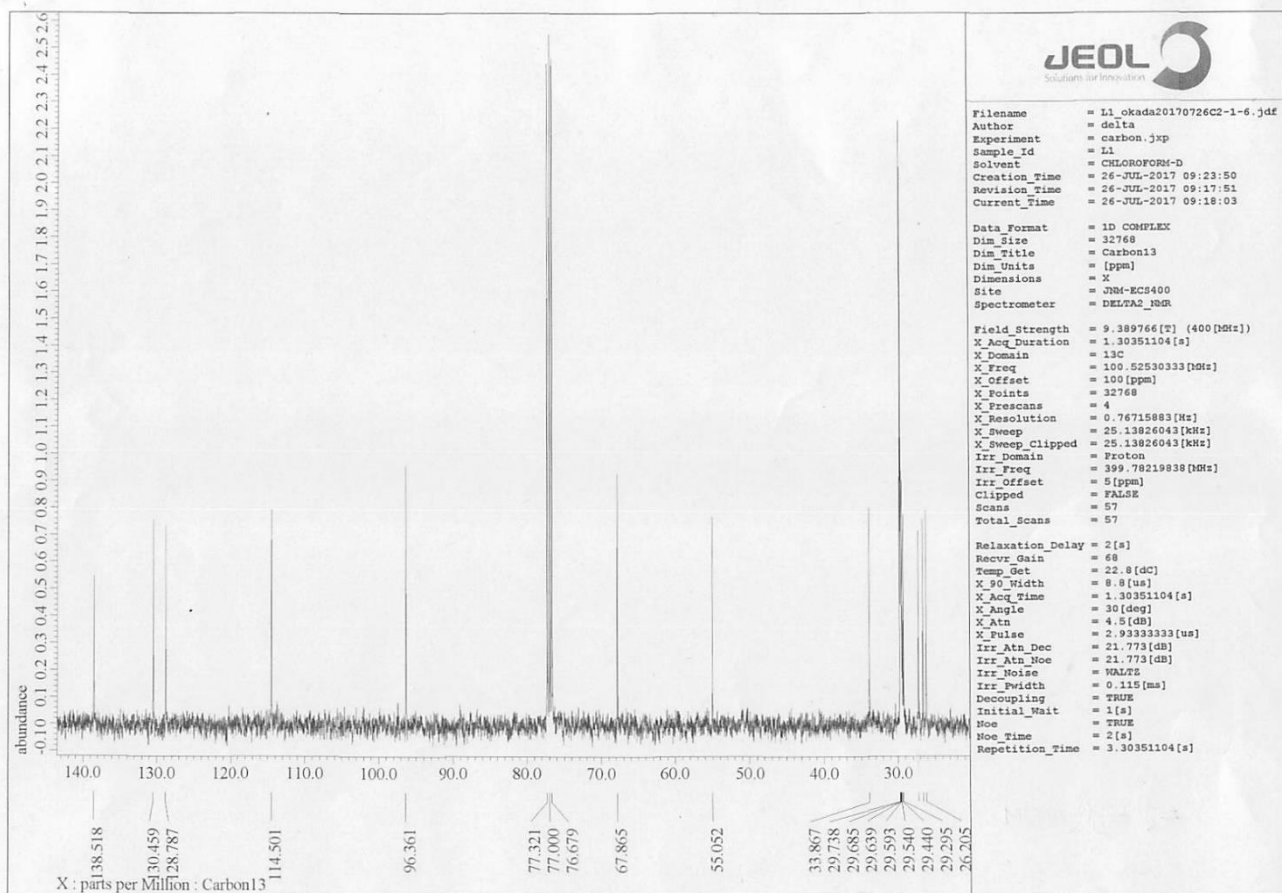

Figure S3 <sup>1</sup>H and <sup>13</sup>CMR spectra of **6b**

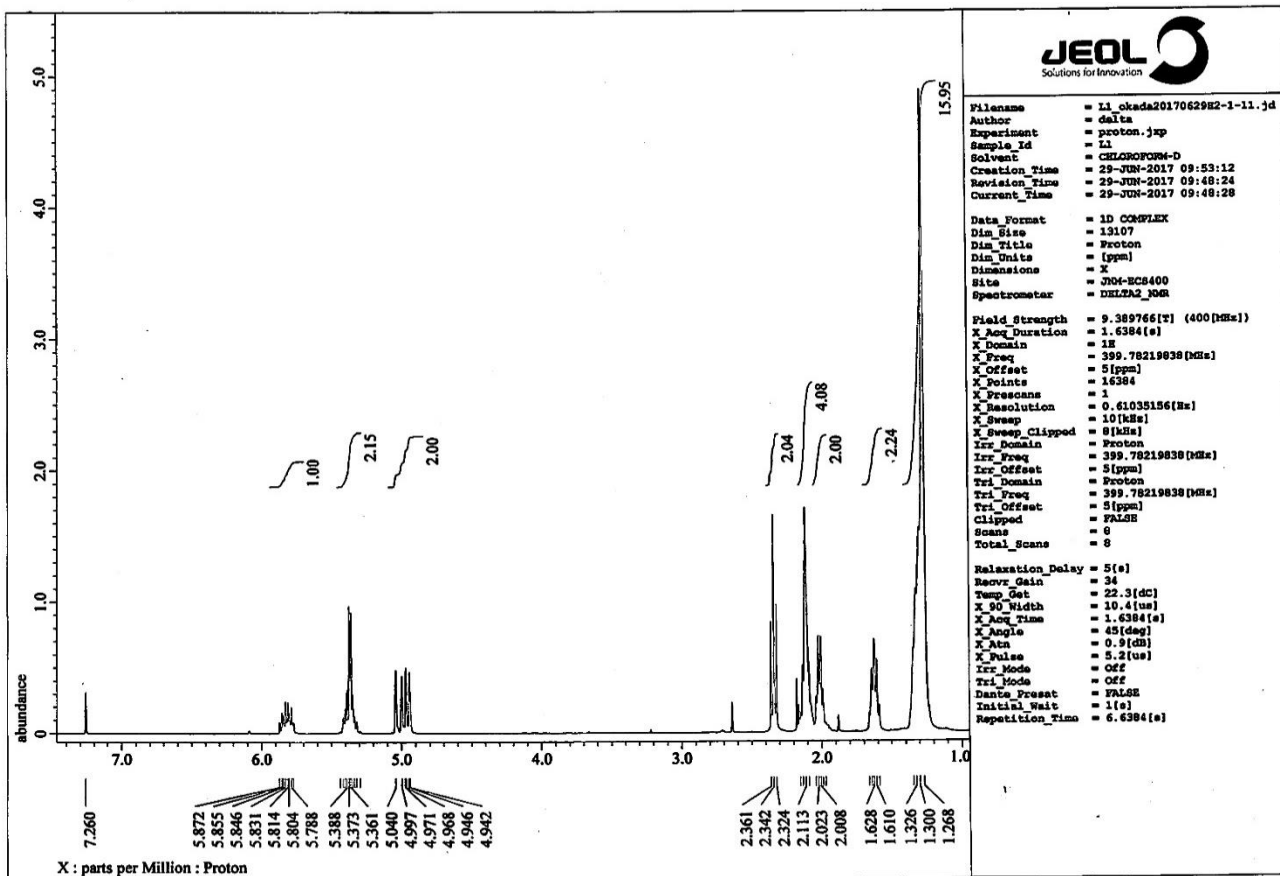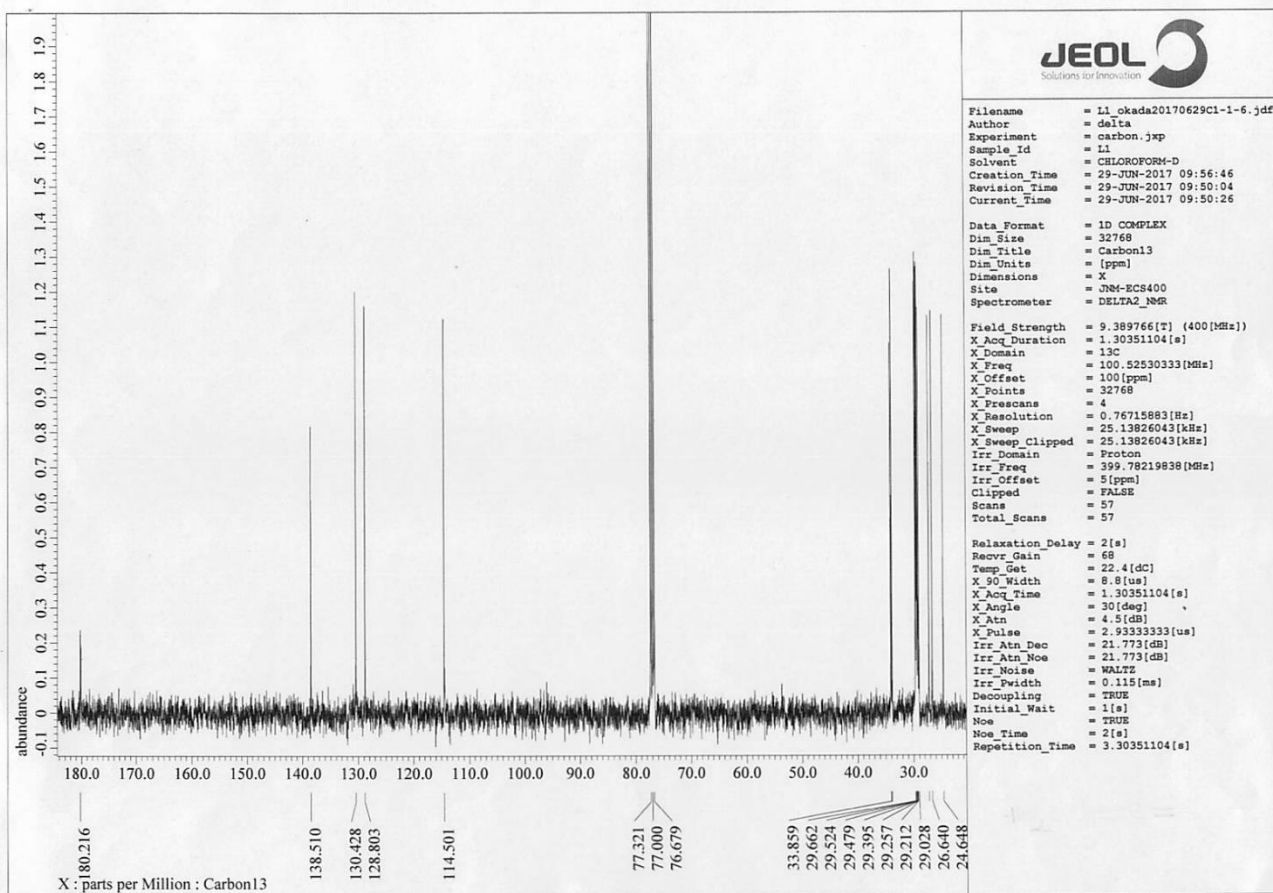

Figure S4  $^1\text{H}$  and  $^{13}\text{C}$ MR spectra of synthesized compound 1

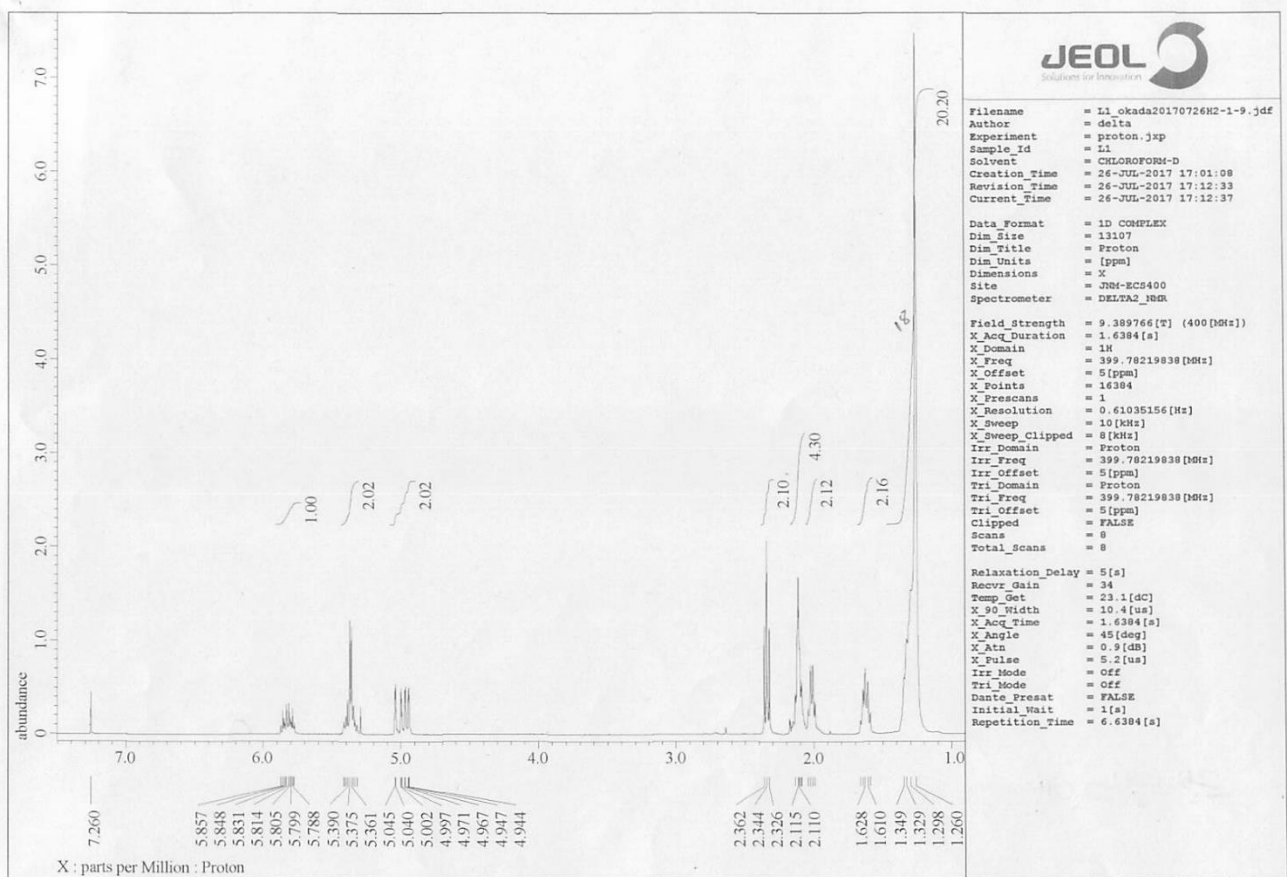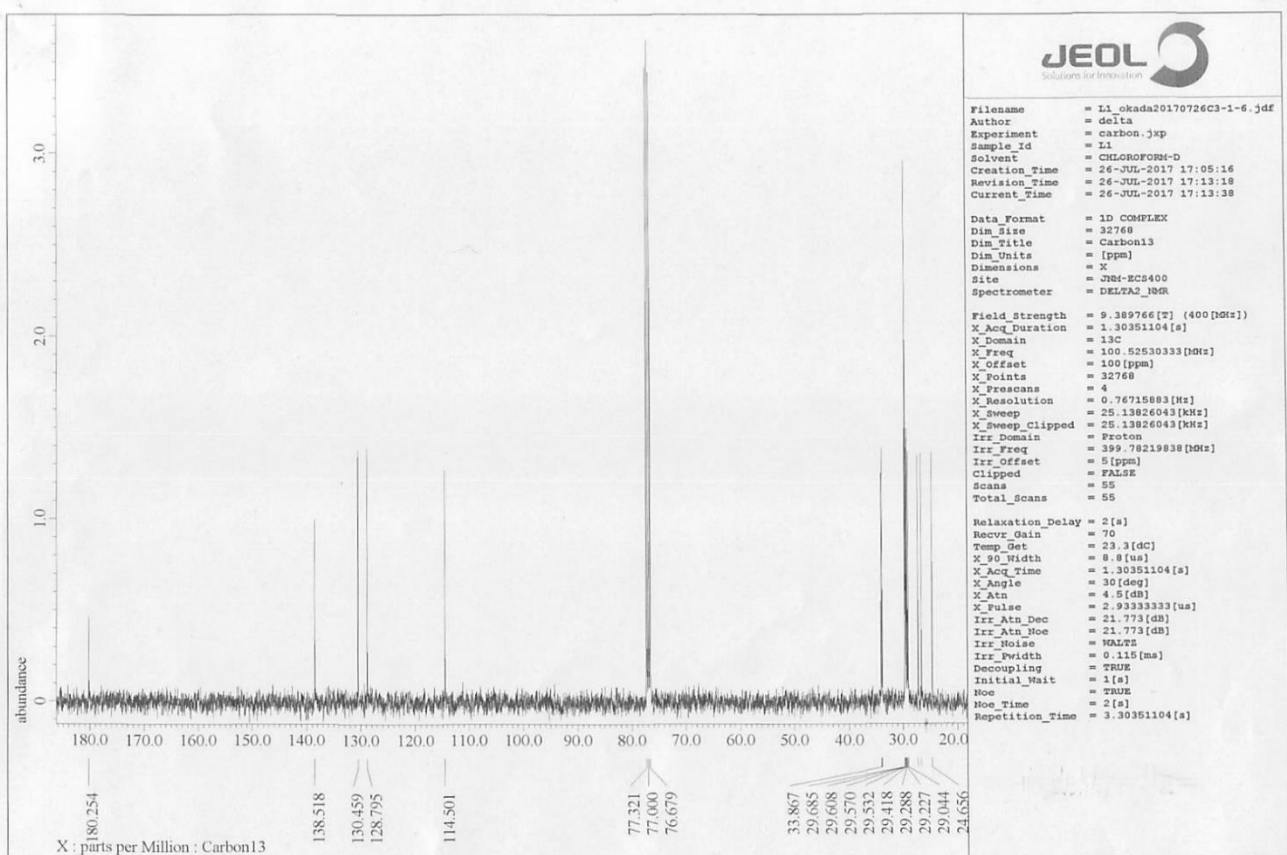

Figure S5 <sup>1</sup>H and <sup>13</sup>CMR spectra of synthesized compound 2
